# Supplementary material
Source: PubMed Central journal article supplement (PMC3029704)
Supplement: 1011066108_pnas.201011066SI.pdf [file 1011066108_pnas.201011066SI.pdf]

# Supporting Information

Kim et al. 10.1073/pnas.1011066108

## SI Text

**Phytochromes Inhibit Hypocotyl Negative Gravitropism at the Early Seedling Stage.** We first determined when red light inhibits hypocotyl negative gravitropism. For this analysis, we grew seedlings in the dark and then transferred them to red light. Seedlings that were transferred to red light after incubation in the dark for 0 or for 24 h grew in random directions (Fig. S2A), indicating that the first 24 h of darkness do not confer hypocotyl negative gravitropism. When the seedlings were transferred to red light after incubation in the dark for 36 h or more, the lower parts of the hypocotyl grew upright, whereas the upper parts curved and grew in various directions. As the dark incubation time increased from 36 to 60 h, the negatively gravitropic parts of the hypocotyl became longer and the agravitropic upper parts became concomitantly shorter. Unlike the wild-type, hypocotyls of the *phyB* mutant were negatively gravitropic irrespective of light conditions. These results indicated that red light begins to inhibit negative gravitropism at later than 24 h after germination induction and can do so at any time thereafter. Under our experimental conditions, radicles emerged at  $\approx 24$  h, and hypocotyls were elongated and clearly distinguished from roots by the hairy root-hypocotyl junction 36 h after the induction of germination

(Fig. S1), indicating that red light is effective in inhibiting hypocotyl negative gravitropism once the hypocotyl starts elongating.

The reciprocal analysis further indicated that red light inhibits hypocotyl negative gravitropism at some point during 24 to 36 h time interval after germination induction. For the reciprocal analysis, we grew seedlings under red light and then transferred them to the dark. When red light-grown seedlings were transferred to the dark immediately after germination induction or 24 h after incubation in red light, the seedlings grew upward, displaying normal negative gravitropism (Fig. S2B). However, when red light-grown seedlings were transferred at 36, 48, or 60 h, seedlings began to grow in random directions, displaying agravitropism. Unlike the wild-type, hypocotyls of the *phyB* mutant were negatively gravitropic, irrespective of light conditions as *phyB* mutant hypocotyls did not curve upon transfer from red light to the dark at 36, 48, or 60 h. This finding was in contrast to the curving of wild-type hypocotyls upon transfer from the dark to red light. Taken together, our results suggest that hypocotyl negative gravitropism becomes susceptible to red light inhibition later than 24 after germination induction and hypocotyl negative gravitropism, once inhibited by red light, cannot be restored fully by subsequent dark incubation.

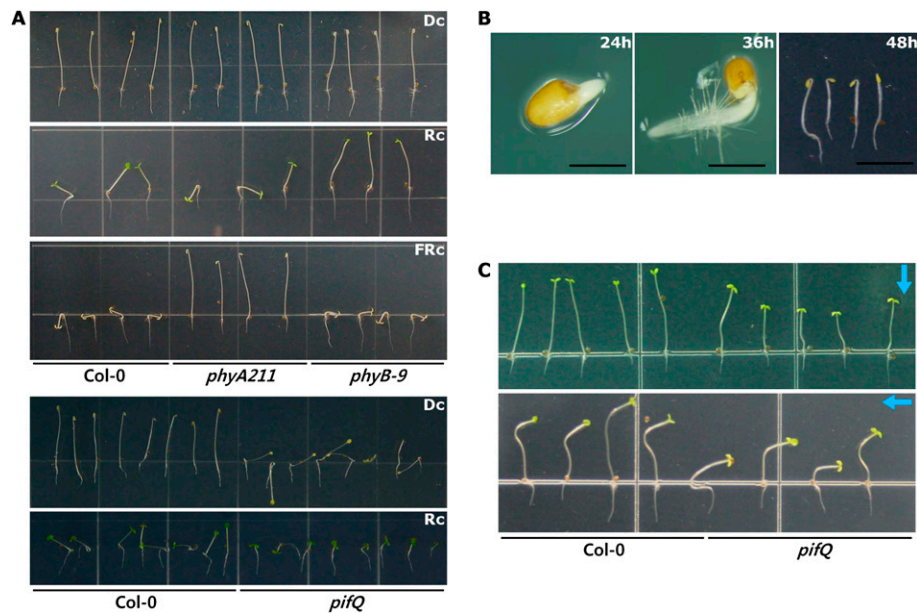

**Fig. S1.** (A) Phytochromes inhibit hypocotyl negative gravitropism, whereas phytochrome-interacting factors (PIFs) promote hypocotyl negative gravitropism. The wild-type (Col-0), the *phyA* mutant (*phyA-211*), the *phyB* mutant (*phyB-9*), and the *pif* quadruple mutant (*pifQ*) were grown in the dark, in red light, or in far-red light for 3 d on vertical agar plates. Dc, Rc, and FRc indicate continuous dark, continuous red light ( $20 \mu\text{mol}\cdot\text{m}^{-2}\cdot\text{s}^{-1}$ ), and continuous far-red light ( $2.4 \mu\text{mol}\cdot\text{m}^{-2}\cdot\text{s}^{-1}$ ), respectively. (B) Germination and growth of seedlings in the dark at 24, 36, and 48 h after the induction of germination. [Scale Bars (Left and Center) 250  $\mu\text{m}$ , (Right) 2.5 mm.] (C) Blue light phototropic growth of wild-type and *pifQ* mutant. Seedlings were irradiated from above with blue light for 3 d (Upper) and irradiated from the side for 2 more days (Lower). Blue arrows indicate the direction of blue light.

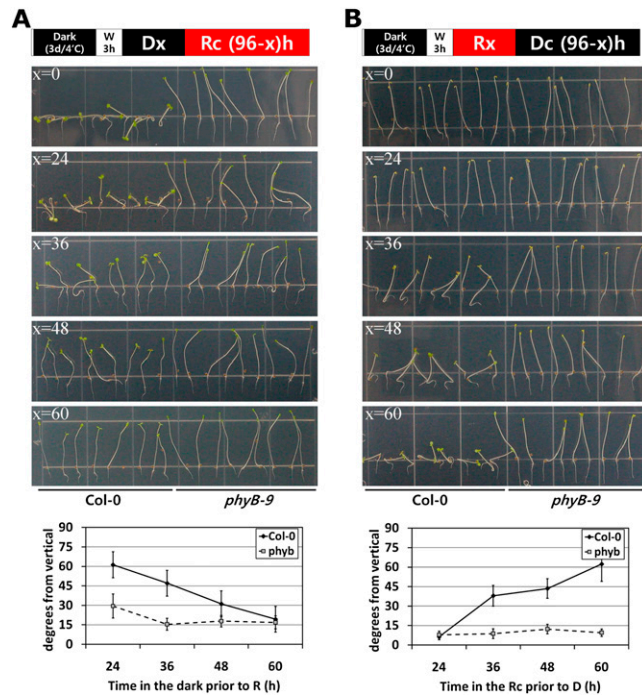

**Fig. S2.** Phytochromes irreversibly inhibit hypocotyl negative gravitropism after 24 h of germination induction. Diagrams indicate light treatment schemes for the transfer experiments. In both experiments, the wild-type (Col-0) and the *phyB* mutant (*phyB-9*) were imbibed for 3 d at 4 °C (Imb. Dark (3 d/4 °C) and irradiated with white light ( $100 \mu\text{mol}\cdot\text{m}^{-2}\cdot\text{s}^{-1}$ ) for 3 h at 22 °C to induce germination [WLc (3 h)]. (A) In the dark-to-red transfer experiments, germination-induced seeds were incubated in the dark for  $x$  hours [Dc ( $x$  h)], transferred to red light ( $20 \mu\text{mol}\cdot\text{m}^{-2}\cdot\text{s}^{-1}$ ), and grown for  $96 - x$  hours [Rc ( $96 - x$ )h] on vertical agar plates. The lower panel indicates the quantification. Data are mean with 95% confidence intervals indicated;  $n = 20$ . (B) In the red-to-dark transfer experiment, germination-induced seeds were incubated in red light ( $20 \mu\text{mol}\cdot\text{m}^{-2}\cdot\text{s}^{-1}$ ) for  $x$  hours [Rc ( $x$ )], transferred to the dark, and grown for  $96 - x$  hours [Dc ( $96 - x$ )h] on vertical agar plates. The lower panel indicates the quantification. Data are mean with 95% confidence intervals indicated;  $n = 24$ .

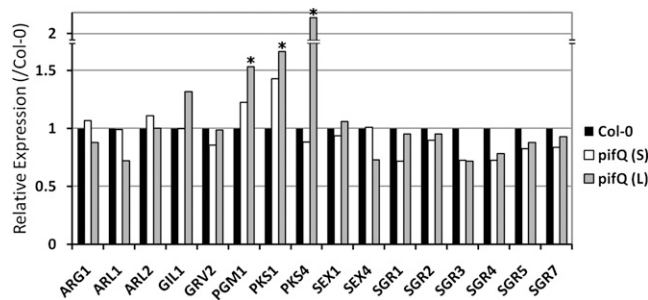

**Fig. S3.** Relative expression levels of gravitropic genes in the dark-grown wild-type and the *pifQ* mutant in two previously reported microarray data GSE14492 [*pifQ* (S)] and GSE17159 [*pifQ* (L)]. None of genes are expressed significantly different between dark-grown wild-type and *pifQ* mutant seedlings [criterion:  $>1.5$  fold, false-discovery rate (FDR)  $< 0.05$ ] in both microarray data.
